# Supplementary material for: Extracts and Scirpusin B from Recycled Seeds and Rinds of Passion Fruits (Passiflora edulis var. Tainung No. 1) Exhibit Improved Functions in Scopolamine-Induced Impaired-Memory ICR Mice
Source: MDPI journal article supplement (doi:10.3390/antiox12122058), 2023-11-29
Supplement: s1 [file s1]

# Extracts and Scirpusin B from Recycled Seeds and Rinds of Passion Fruits (*Passiflora edulis* var. Tainung No. 1) Exhibit Improved Functions in Scopolamine-Induced Impaired Memory ICR Mice

Yi-Yan Sie<sup>1,†</sup>, Liang-Chieh Chen<sup>2</sup>, Cai-Wei Li<sup>3,†</sup>, Ching-Chiung Wang<sup>1,3,4,5</sup>, Cai-Jhen Li<sup>3</sup>, Der-Zen Liu<sup>6</sup>, Mei-Hsien Lee<sup>1,3</sup>, Lih-Geeng Chen<sup>4,7,\*</sup>, and Wen-Chi Hou<sup>1,3,\*</sup>

<sup>1</sup> Ph.D. Program in Clinical Drug Development of Herbal Medicine, College of Pharmacy, Taipei Medical University, Taipei 110, Taiwan; d339110003@tmu.edu.tw (Y.-Y. S.); crystal@tmu.edu.tw (C.-C. W.); lmh@tmu.edu.tw (M.-H.L); wchou@tmu.edu.tw (W.-C. H.)

<sup>2</sup> School of Medicine, College of Medicine, National Sun Yat-sen University, Kaohsiung 804, Taiwan; lcchen0908@mail.nsysu.edu.tw

<sup>3</sup> Graduate Institute of Pharmacognosy, Taipei Medical University, Taipei 110, Taiwan; licaiwei@tmu.edu.tw (C.-W. L.); crystal@tmu.edu.tw (C.-C. W.); m303108003@tmu.edu.tw (C.-J. L.); lmh@tmu.edu.tw (M.-H.L); wchou@tmu.edu.tw (W.-C. H.)

<sup>4</sup> Traditional Herbal Medicine Research Center, Taipei Medical University Hospital, Taipei, Taiwan; crystal@tmu.edu.tw (C.-C. W.); lgchen@mail.ncyu.edu.tw (L.-G. C.)

<sup>5</sup> School of Pharmacy, Taipei Medical University, Taipei 110, Taiwan; crystal@tmu.edu.tw

<sup>6</sup> Graduate Institute of Biomedical Materials and Tissue Engineering, Taipei Medical University, Taipei 110, Taiwan; tonyliu@tmu.edu.tw

<sup>7</sup> Department of Microbiology, Immunology and Biopharmaceuticals, College of Life Sciences, National Chiayi University, Chiayi 600, Taiwan; lgchen@mail.ncyu.edu.tw

\* Correspondence: lgchen@mail.ncyu.edu.tw (L.-G. C); wchou@tmu.edu.tw (W.-C.H.)

† These two authors contributed equally to this work.

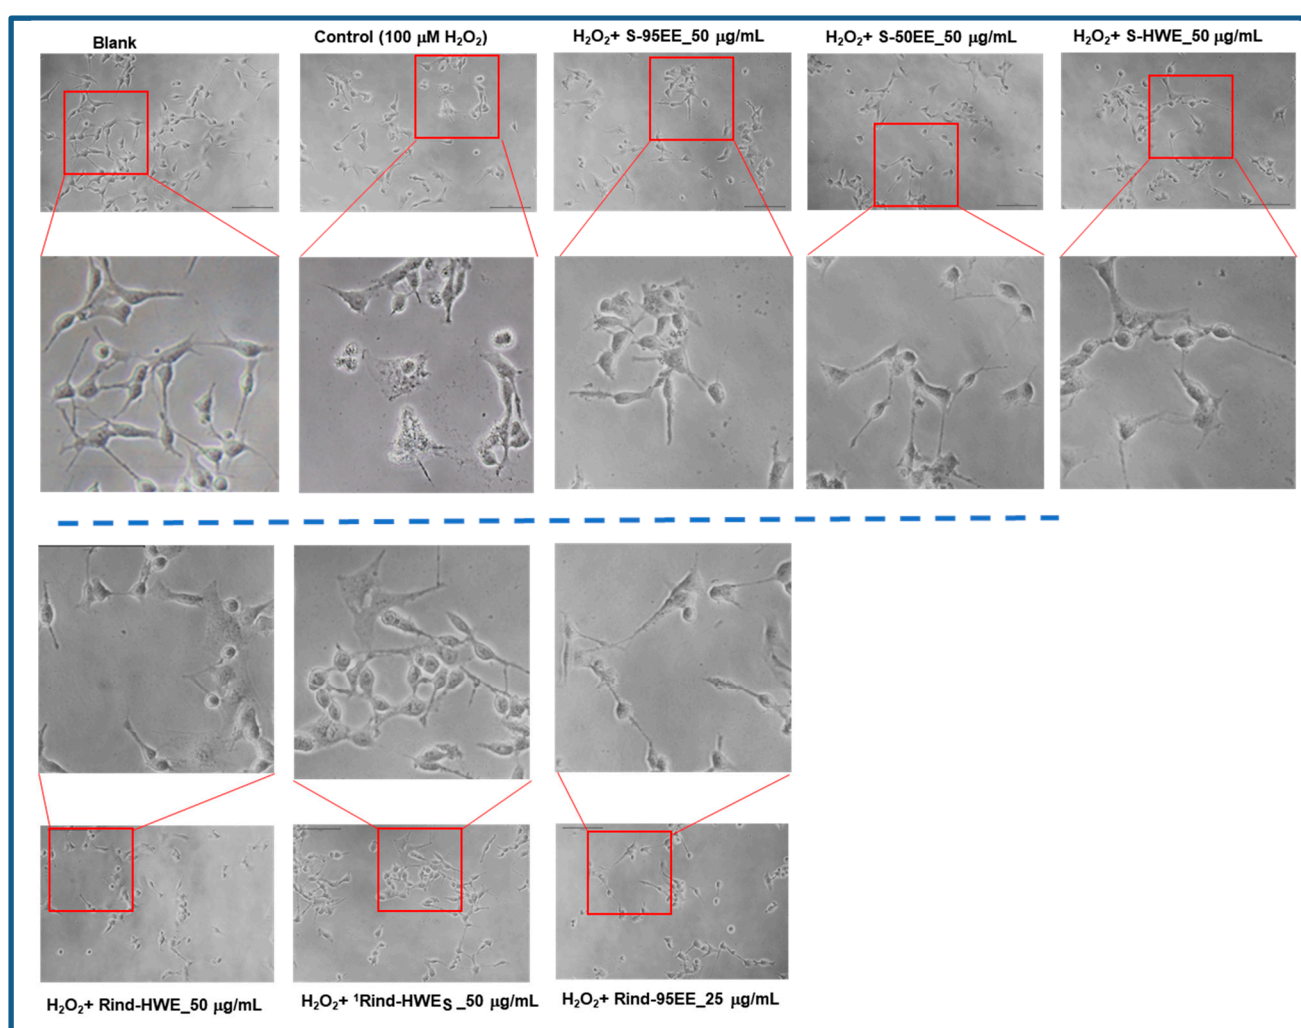

**Figure S1.** Effects of seed extracts (50  $\mu\text{g/mL}$ ) and rind extracts (25 or 50  $\mu\text{g/mL}$ ) of passion fruits (*Passiflora edulis* var. Tainung No. 1) on cell morphologies of 100  $\mu\text{M}$  hydrogen peroxide-treated SH-SY5Y cells. The cells ( $1 \times 10^4$  cells/well) were seeded onto a 96-well microplate and cultured in a DMEM/F-12 medium containing 10% FBS for 24 h at 37  $^{\circ}\text{C}$  under a humidified atmosphere and 5%  $\text{CO}_2$ . The treated medium were removed, washed with PBS, and 100  $\mu\text{M}$  hydrogen peroxide in PBS were added to the medium for another 24 h culture. The cell morphologies were photographed (400-fold magnifications) and local zooms of images (red square frame) using an inverted microscope (ECLIPSE TS100, Nikon Instruments Inc., Tokyo, Japan). S, de-oiled seed powders; 95EE, 95% ethanol extracts; 50EE, 50% ethanol extracts; HWE, hot-water extracts.

<sup>1</sup>Ethanol was added to Rind-HWE solution to final 80%, the precipitates were removed, and the supernatants were concentrated under reduced pressures and then lyophilized as the Rind-HWE<sub>s</sub>.
